# Supplementary material for: Earth System Model Evaluation Tool (ESMValTool) v2.0 – technical overview
Source: Copernicus journal article supplement (doi:10.5194/gmd-13-1179-2020), 2020-03-16
Supplement: Supplementary file 1 [file gmd-13-1179-2020-supplement.zip]

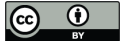

## *Supplement of*

# **Earth System Model Evaluation Tool (ESMValTool) v2.0 – technical overview**

**Mattia Righi et al.**

*Correspondence to:* Mattia Righi ([mattia.righi@dlr.de](mailto:mattia.righi@dlr.de))

- [gmd-13-1179-2020-supplement-title-page.pdf](#)
- [recipe\\_ncl.yml](#)
- [recipe\\_perfmetrics\\_CMIP5\\_benchmark.yml](#)
- [recipe\\_python.yml](#)
- [recipe\\_r.yml](#)

The copyright of individual parts of the supplement might differ from the CC BY 4.0 License.
